# Supplementary material for: Corticosteroids in sepsis: an updated systematic review and meta-analysis (protocol)
Source: PubMed Central journal article supplement — BMJ Open. 2017 Jun 30;7(6):e016847. doi: 10.1136/bmjopen-2017-016847 (PMC5726130; doi:10.1136/bmjopen-2017-016847), 2017-06-30
Supplement: bmjopen-2017-016847supp001.pdf [file bmjopen-2017-016847supp001.pdf]

**Appendix. Search strategy for MEDLINE (Ovid SP)**

1. exp Sepsis/
2. exp Shock, Septic/
3. (sepsis or septic shock).mp.
4. 1 or 2 or 3
5. exp Adrenal Cortex Hormones/
6. (corticosteroid\* or steroid\*).mp.
7. 6 or 5
8. 4 and 7
9. ((randomized controlled trial or controlled clinical trial).pt. or randomized.ab. or placebo.ab. or clinical trials as topic.sh. or randomly.ab. or trial.ti.) not (animals not (humans and animals)).sh.
10. 8 and 9
